# Supplementary material for: The synthesis of a perovskite CsPbBr3 quantum dot superlattice in borosilicate glass
Source: Royal Society of Chemistry journal article supplement (doi:10.1039/d0cc00075b), 2020-01-01
Supplement: d0cc00075b6.pdf [file d0cc00075b6.pdf]

## Supporting Information

### Synthesis of Perovskite CsPbBr<sub>3</sub> Quantum Dot Superlattice in Borosilicate Glass

Enhao Cao<sup>a,b</sup>, Jianbei Qiu<sup>a,b,\*</sup>, Dacheng Zhou<sup>a,b</sup>, Yong Yang<sup>a,b,\*</sup>, Qi Wang<sup>a,b</sup>, Yugeng Wen<sup>a,b</sup>

<sup>a</sup> School of Materials Science and Engineering, Kunming University of Science and Technology, Kunming 650093, China

<sup>b</sup> Key Laboratory of Advanced Materials of Yunnan Province, Kunming 650093, China

\* Authors to whom correspondence should be addressed: qiu@kust.edu.cn and yang@kust.edu.cn

## Experimental Section

### Materials and chemicals

Silicon dioxide (SiO<sub>2</sub>, 99.99%), boron oxide (B<sub>2</sub>O<sub>3</sub>, 98%), zinc oxide (ZnO, 99%), caesium carbonate (Cs<sub>2</sub>CO<sub>3</sub>, 99%), lead bromide (PbBr<sub>2</sub>, 99%) and sodium bromide (NaBr, 99%) were purchased from Aladdin. All chemicals were used without further purification.

### Preparation of CsPbBr<sub>3</sub> QDs glass

The samples of pristine glass (PG) were prepared via classical melt-quenching method with nominal composition of (35.7-3.5x)SiO<sub>2</sub>-(24.5+3.5x)B<sub>2</sub>O<sub>3</sub>-9.8ZnO-6Cs<sub>2</sub>CO<sub>3</sub>-12PbBr<sub>2</sub>-12NaBr (mol.%) ( $x = 1, 2, 3$ , denoted PG1, PG2, PG3, respectively). The raw materials were well mixed and melted at 1150°C for 20 min under ambient atmosphere. Then the melt of mixture was poured onto a preheated brass plate and pressed by another plate. The glasses of PG1, PG2 and PG3 were annealed at 360°C for 2 h, and were then heated at 475°C for 2 h to obtain CsPbBr<sub>3</sub> QDs and/or CsPbBr<sub>3</sub> QD superlattices embedded glasses (denoted QG1, QG2, QG3, respectively).

### Characterizations

The CsPbBr<sub>3</sub> QDs and/or CsPbBr<sub>3</sub> QD superlattices embedded glasses were optical polished or ground into powders for subsequent characterization and usage. X-ray diffraction (XRD) analysis was carried out to identify the crystallized phase structure using a Bruker D8 powder diffractometer with a Cu K $\alpha$  incident radiation source. Microstructural observation of samples was conducted on a JEOL JEM-2100 transmission electron microscope (TEM). Absorption spectra were recorded using a Hitachi U4100 spectrophotometer. Photoluminescence (PL) and photoluminescence excitation (PLE), excitation-emission mapping, and PL decay were recorded using an Edinburgh FLS980 spectrophotometer. Raman spectra were determined by a LabRAM HR Evolution Raman spectrometer operated with a 532 nm excitation source.

As shown in Fig. S1, we obtain a primrose transparent CsPbBr<sub>3</sub> QD embedded glass at 475°C while other glasses are either colorless at 435°C or devitrificated at 515°C, 555°C and 595°C.

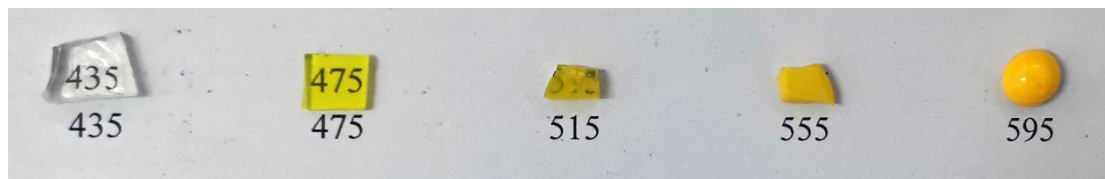

Fig. S1 The photograph of PG1 glass heated under different temperatures (435°C, 475°C, 515°C, 555°C and 595°C) for 2 h.

Table S1 The quantitative change of topological organization from Raman spectra

| glass | [BO <sub>3</sub> ]/[BO <sub>4</sub> ] | [BO <sub>3</sub> ]/[SiO <sub>4</sub> ] | [BO <sub>4</sub> ]/[SiO <sub>4</sub> ] |
|-------|---------------------------------------|----------------------------------------|----------------------------------------|
| PG1   | 1.22                                  | 0.81                                   | 0.66                                   |
| PG2   | 1.25                                  | 0.85                                   | 0.68                                   |
| PG3   | 1.64                                  | 1.13                                   | 0.68                                   |

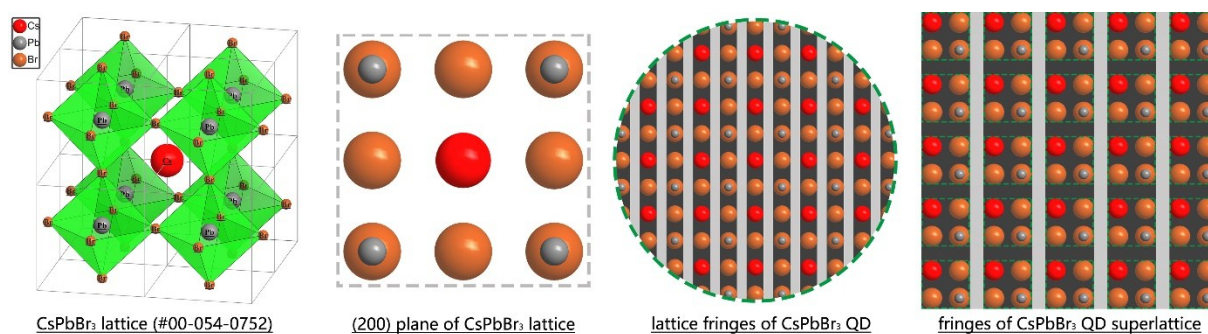

Fig. S2 Schematic illustration. (a) CsPbBr<sub>3</sub> lattice. (b) (200) plane of CsPbBr<sub>3</sub> lattice. (c) lattice fringes of CsPbBr<sub>3</sub> QD. (d) fringes of CsPbBr<sub>3</sub> QD superlattice.

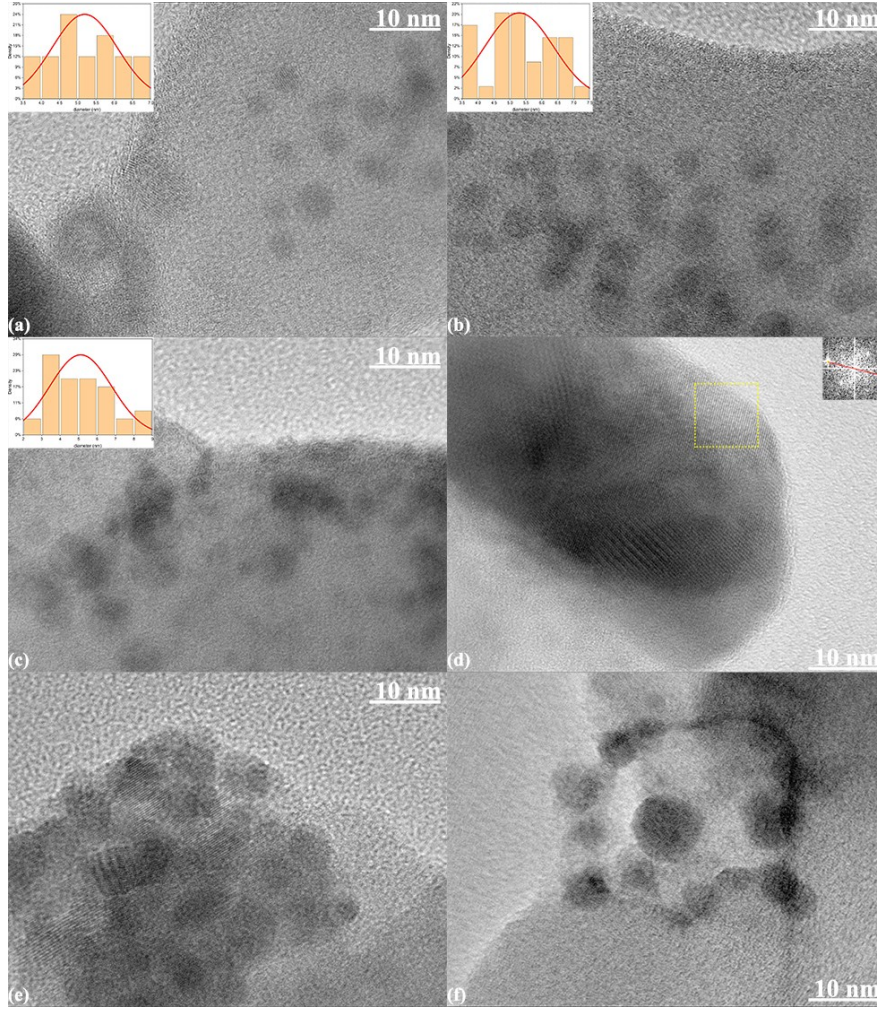

Fig. S3 TEM images of CsPbBr<sub>3</sub> morphology. (a)-(c) distribution of CsPbBr<sub>3</sub> QDs in QG1, QG2, QG3. (d) CsPbBr<sub>3</sub> QD superlattice lattice. (e)-(f) aggregation of CsPbBr<sub>3</sub> QDs.

Table S2 The average size of CsPbBr<sub>3</sub> QD

| glass             | QG1 | QG2 | QG3 |
|-------------------|-----|-----|-----|
| average size (nm) | 5.2 | 5.3 | 5.1 |

We measured their corresponding radiation lifetimes under different power density excitation as shown in Fig. S4. And the average decay lifetime are calculated based on the following equation S(1)

$$\tau_{ave} = \int I(t)dt/I_0 \quad S(1)$$

where  $I_0$  is the peak intensity and  $I(t)$  is the recording-time related PL intensity.

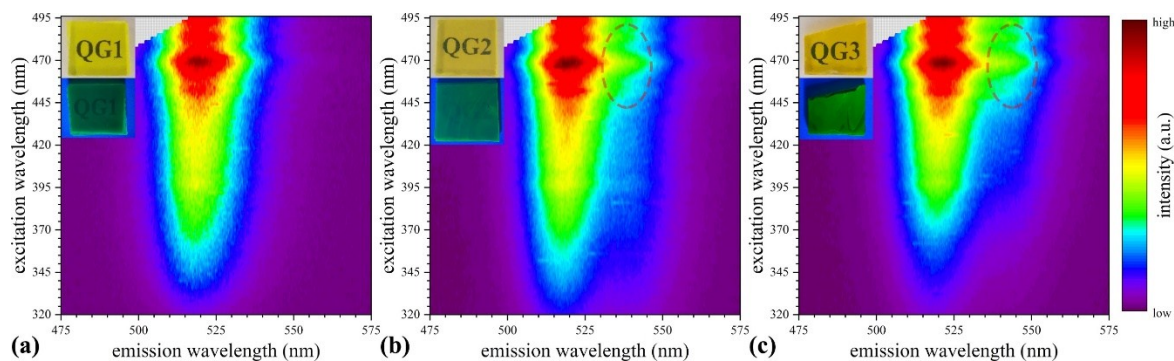

Fig. S4 Two-dimensional excitation-emission mappings of (a) QG1, (b) QG2, (c) QG3, and the inset shows the photograph of CsPbBr<sub>3</sub> QDs embedded glasses under daylight and 365 nm UV lamp.

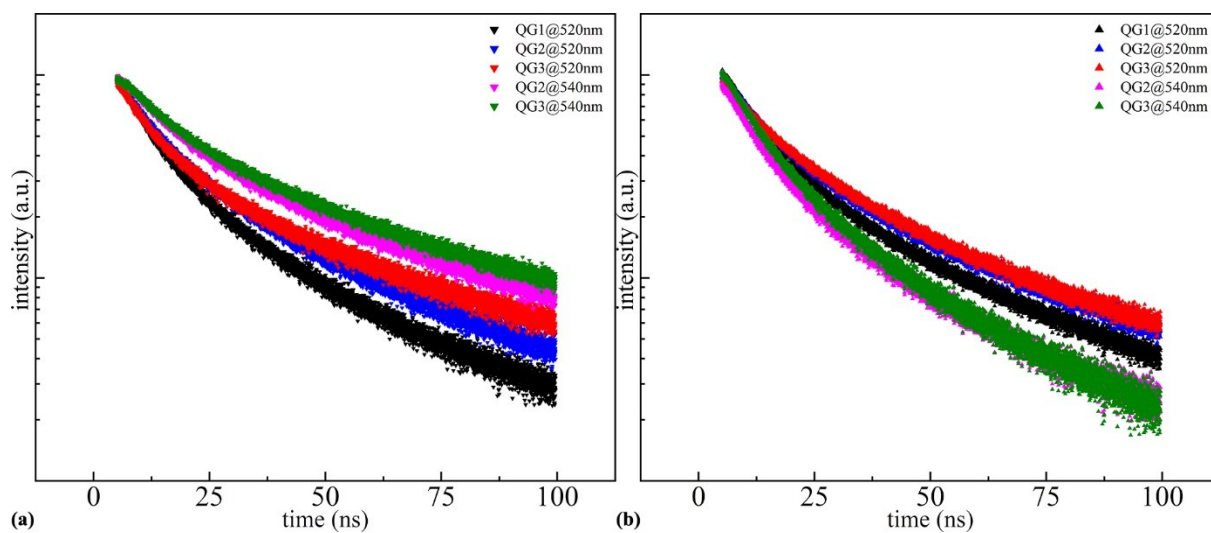

Fig. S5 Time-resolved PL decays curves under (a) low power density excitation and (b) high power density excitation.

Table S3 The lifetimes under different power density excitation

| PL decays curves                                      | QG1    | QG2    | QG3    | QG2    | QG3    |
|-------------------------------------------------------|--------|--------|--------|--------|--------|
|                                                       | @520nm | @520nm | @520nm | @540nm | @540nm |
| $\tau_{ave}$ (ns) under low power density excitation  | 15.87  | 18.93  | 19.78  | 25.74  | 27.84  |
| $\tau_{ave}$ (ns) under high power density excitation | 19.29  | 21.57  | 21.99  | 14.65  | 16.37  |
